# Supplementary material for: Ameliorating effects of Gö6976, a pharmacological agent that inhibits protein kinase D, on collagen-induced arthritis
Source: PubMed Central journal article supplement (PMC6897462; doi:10.1371/journal.pone.0226145), 2019-12-06

A.

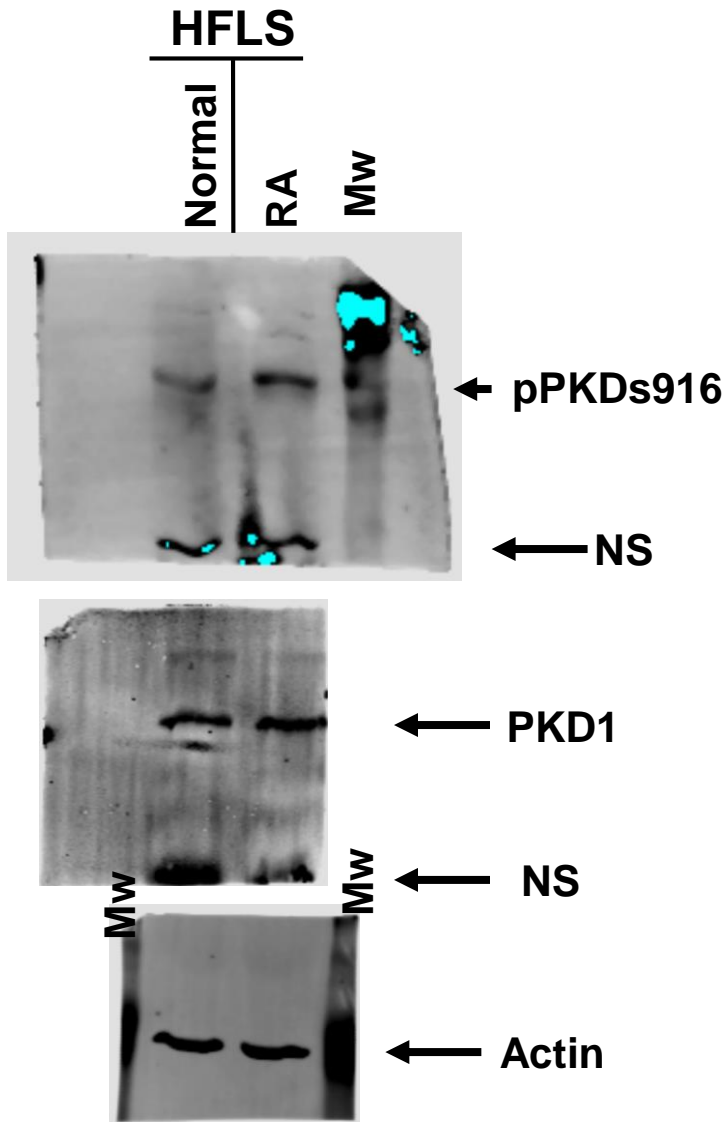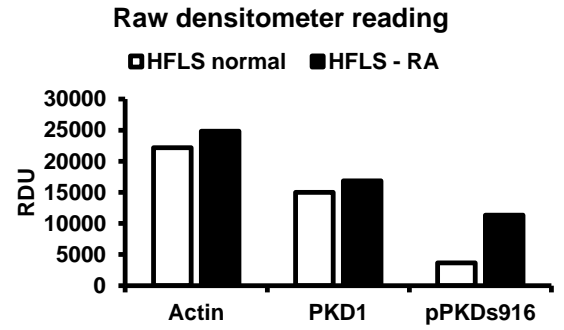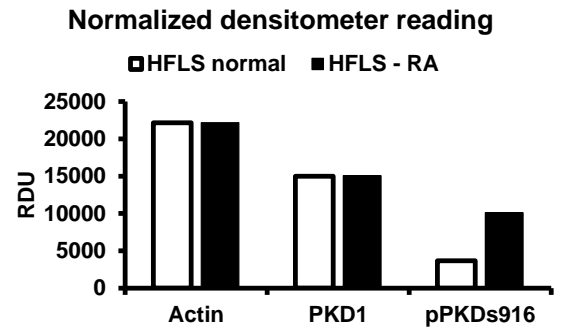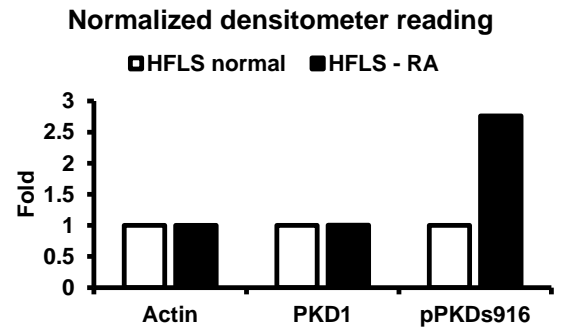

**B.**

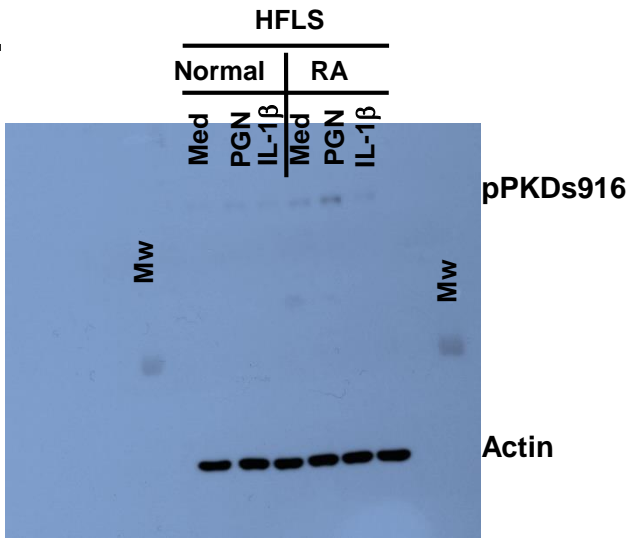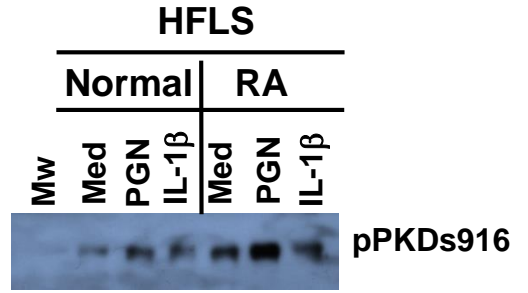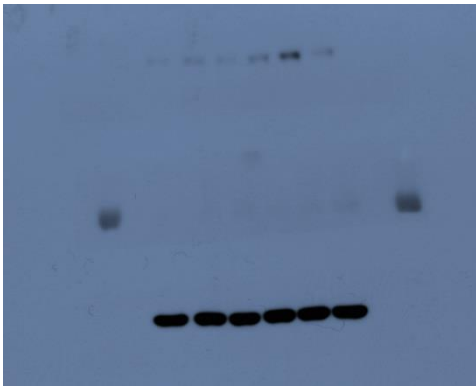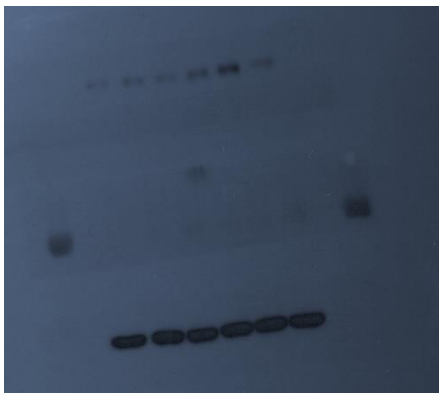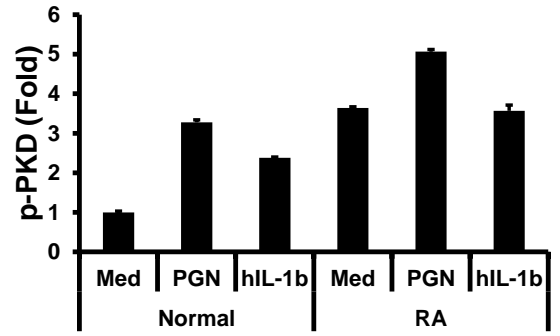

C.

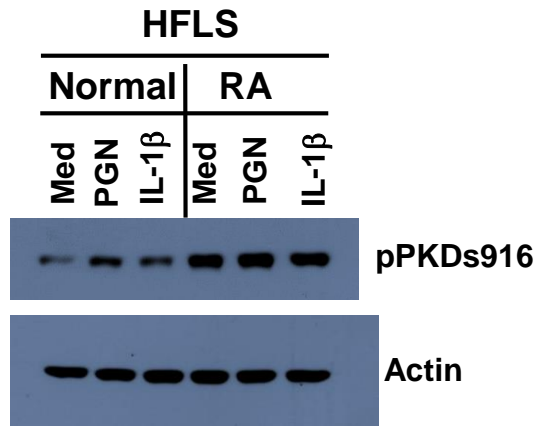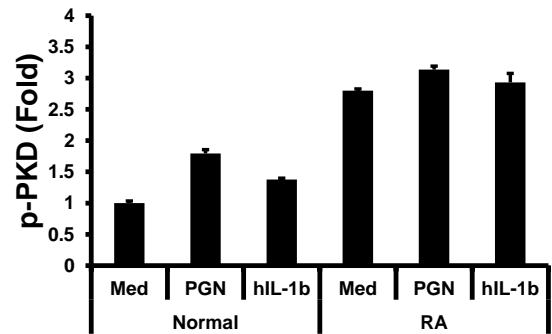

D.

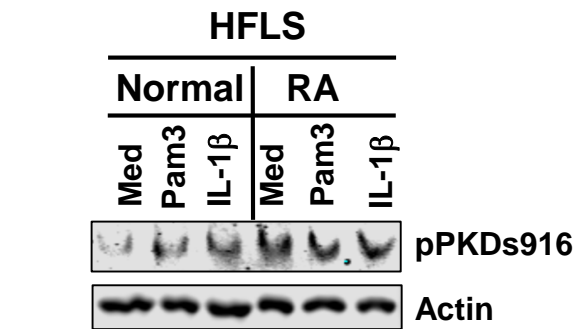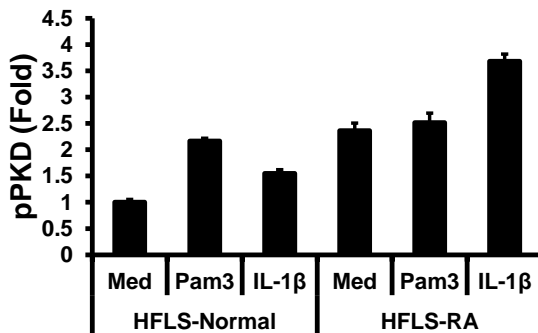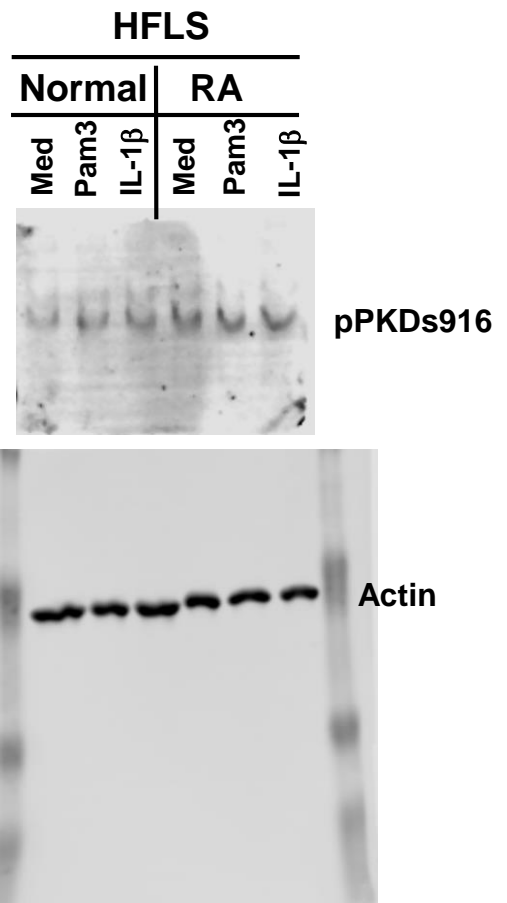

**E.**

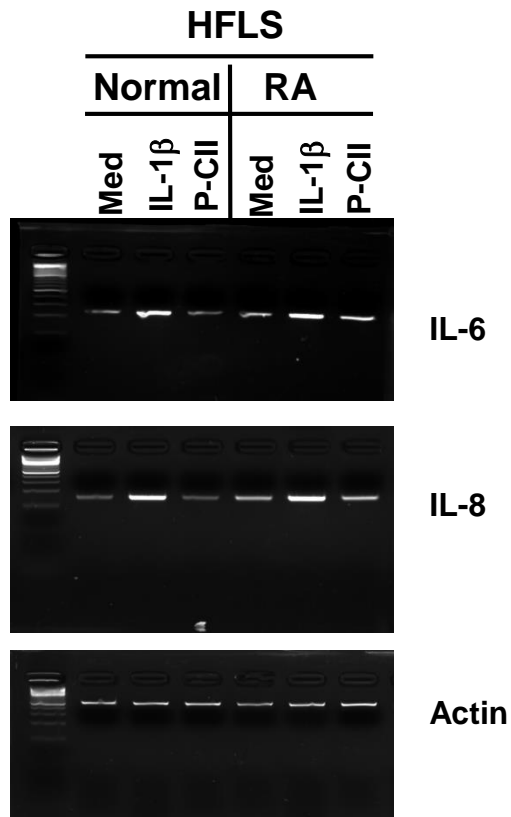

F.

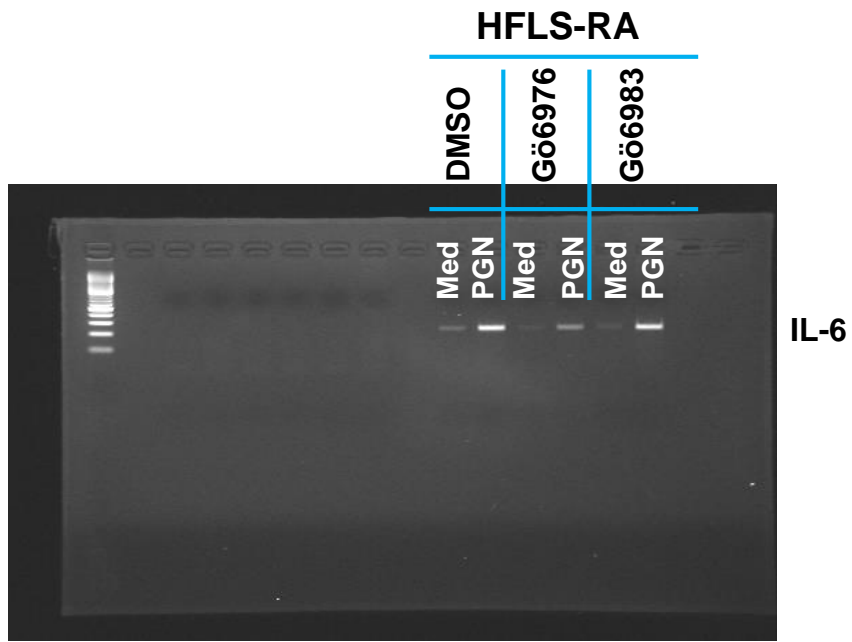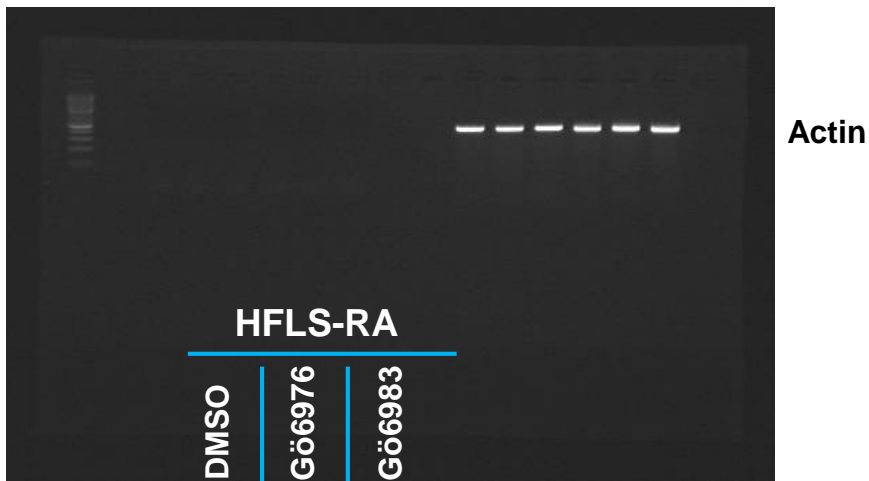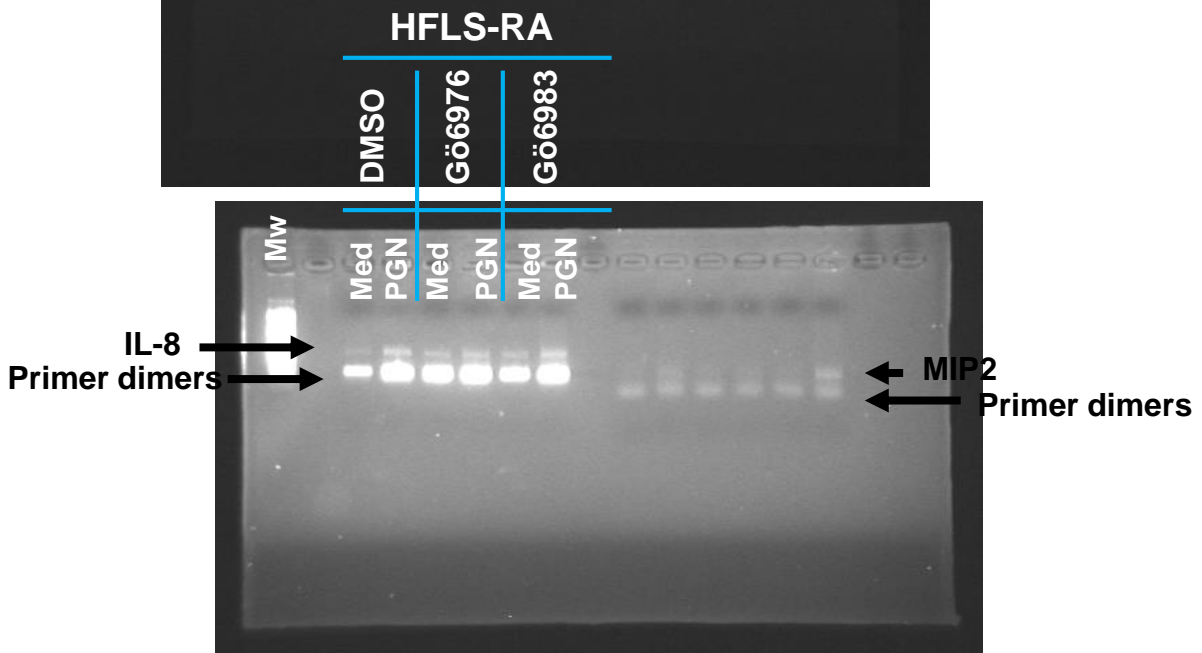

G.

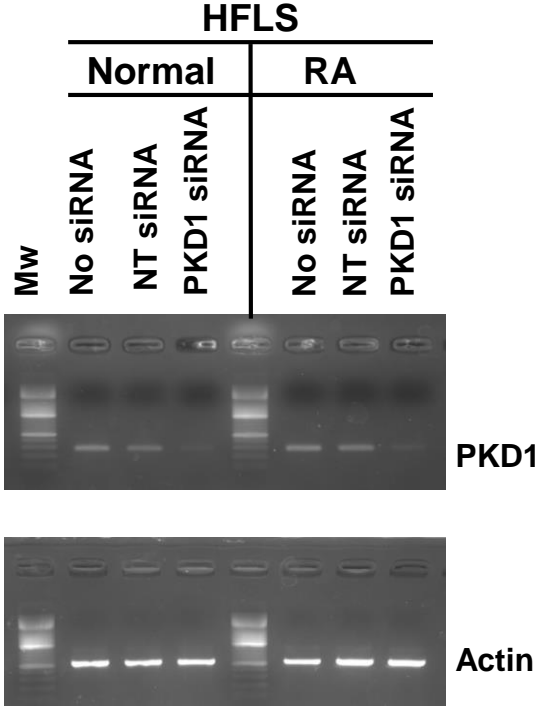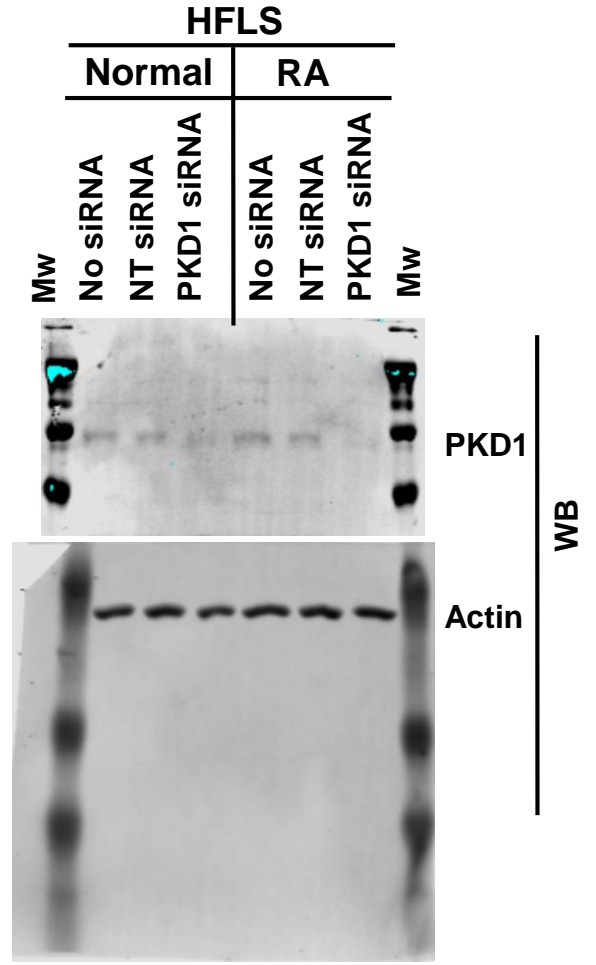

H.

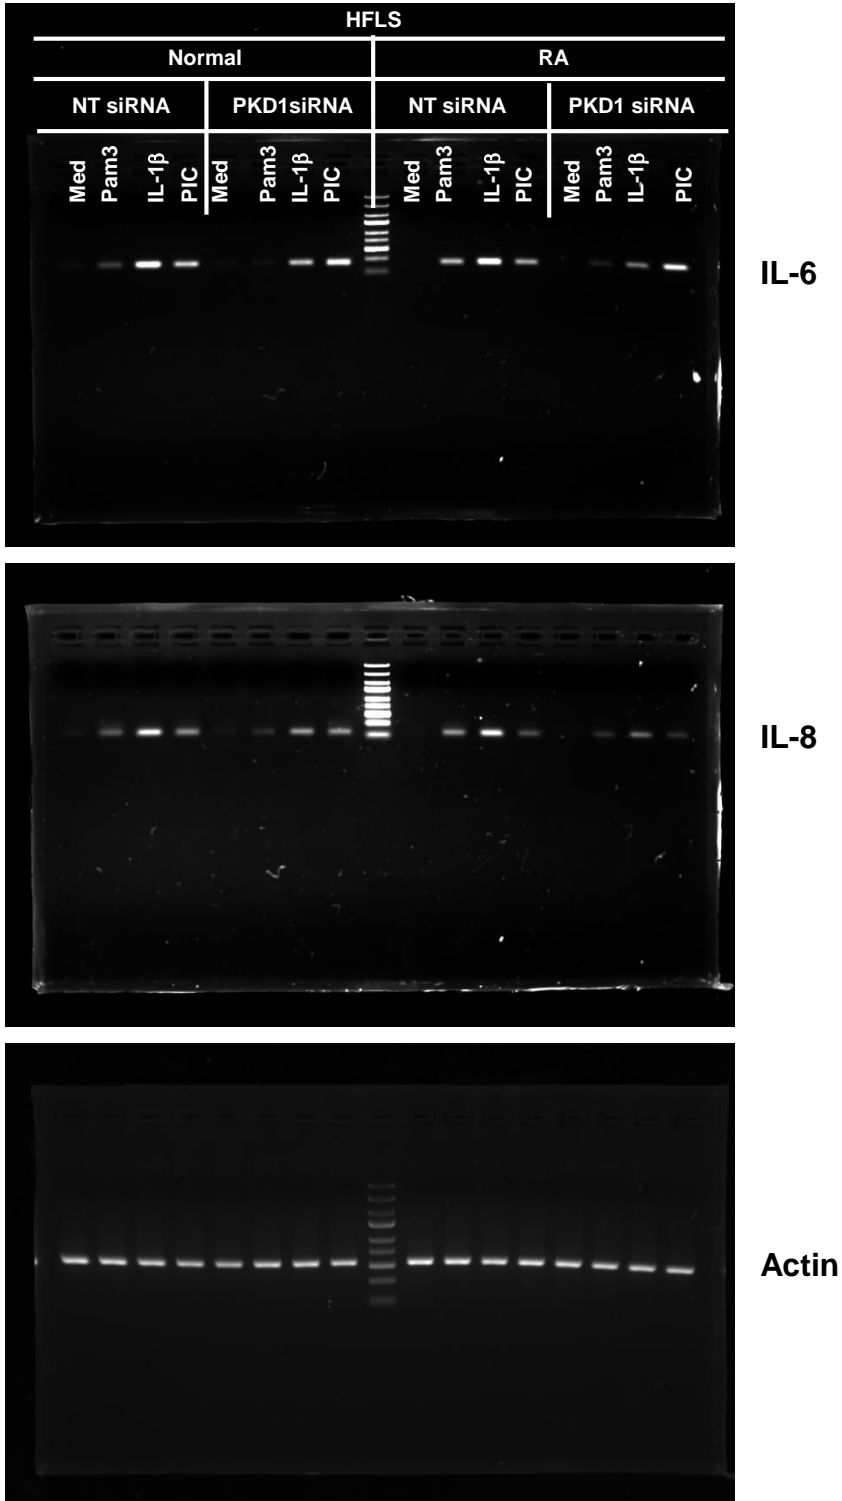

Supplement: pone.0226145.s001.pdf [file pone.0226145.s001.pdf]
